# Supplementary material for: Value of uncertain streamflow observations for hydrological modelling
Source: Copernicus journal article supplement (doi:10.5194/hess-22-5243-2018), 2018-10-15
Supplement: Supplementary file 1 [file hess-22-5243-2018-supplement.pdf]

Supplement of Hydrol. Earth Syst. Sci., 22, 5243–5257, 2018  
<https://doi.org/10.5194/hess-22-5243-2018-supplement>  
© Author(s) 2018. This work is distributed under  
the Creative Commons Attribution 4.0 License.

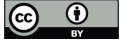

*Supplement of*

## **Value of uncertain streamflow observations for hydrological modelling**

**Simon Etter et al.**

*Correspondence to:* Simon Etter ([simon.etter@geo.uzh.ch](mailto:simon.etter@geo.uzh.ch))

The copyright of individual parts of the supplement might differ from the CC BY 4.0 License.

1 **Supplemental Material**

2 **Model parameters**

3 **Table S1 Parameter ranges used for calibration of the HBV-model**

| Parameter                                 | Description <sup>a</sup>                                                                                                          | Unit                               | Min    | Max   |
|-------------------------------------------|-----------------------------------------------------------------------------------------------------------------------------------|------------------------------------|--------|-------|
| <b>Rescaling Parameters of Input Data</b> |                                                                                                                                   |                                    |        |       |
| PCALT                                     | change in precipitation with elevation                                                                                            | % (100m) <sup>-1</sup>             | 5      | 15    |
| TCALT                                     | change in temperature with elevation                                                                                              | °C (10m) <sup>-1</sup>             | 0.5    | 1.5   |
| <b>Snow and ice melt parameters</b>       |                                                                                                                                   |                                    |        |       |
| TT                                        | threshold temperature for liquid and solid precipitation                                                                          | °C                                 | -3     | 1     |
| CFMAX                                     | degree-day factor                                                                                                                 | mmd <sup>-1</sup> °C <sup>-1</sup> | 0.06   | 10    |
| SFCF                                      | snowfall correction factor                                                                                                        | -                                  | 0.4    | 1.6   |
| CFR                                       | refreezing coefficient                                                                                                            | -                                  | 0.001  | 0.9   |
| CWH                                       | water holding capacity of the snow storage                                                                                        | -                                  | 0.001  | 0.9   |
| <b>Soil Parameters</b>                    |                                                                                                                                   |                                    |        |       |
| PERC                                      | maximum percolation from upper to lower groundwater storage                                                                       | mm d <sup>-1</sup>                 | 0      | 3     |
| UZL                                       | threshold parameter                                                                                                               | mm                                 | 0      | 100   |
| K0                                        | storage (or recession) coefficient 0                                                                                              | d <sup>-1</sup>                    | 0.001  | 0.5   |
| K1                                        | storage (or recession) coefficient 1                                                                                              | d <sup>-1</sup>                    | 0.0001 | 0.2   |
| K2                                        | storage (or recession) coefficient 2                                                                                              | d <sup>-1</sup>                    | 2E-06  | 0.005 |
| MAXBAS                                    | length of triangular weighting function                                                                                           | H                                  | 1      | 7     |
| FC                                        | maximum soil moisture storage                                                                                                     | Mm                                 | 50     | 550   |
| LP                                        | soil moisture value above which actual evapotranspiration reaches potential evapotranspiration                                    | -                                  | 0.3    | 1     |
| Beta                                      | shape factor for the function used to calculate the distribution of rain and snow melt going to runoff and soil box, respectively | -                                  | 1      | 5     |

<sup>a</sup>a detailed description of the model parameters is given in (Seibert and Vis, 2012).

5 **Significance of median model performance compared to the lower benchmark**

6 **Table S2 Significance of the differences in median model performance for each temporal resolution and an error**  
 7 **group compared to the lower benchmark (Mann-Whitney U-test). The p-values of the Kruskal-Wallis test for the**  
 8 **within group variability in the lowermost row shows that the median model performance of the different error groups**  
 9 **was significantly different.**

|                    | No Error | Small Error | Medium Error | Large Error |
|--------------------|----------|-------------|--------------|-------------|
| Hourly             | <0.01    | <0.01       | <0.01        | <0.01       |
| Weekly             | <0.01    | <0.01       | <0.01        | 0.75        |
| Crowd52            | <0.01    | <0.01       | <0.01        | 0.40        |
| Monthly            | <0.01    | <0.01       | <0.01        | 0.03*       |
| Crowd12            | <0.01    | <0.01       | 0.11         | <0.01*      |
| WeekendSpring      | <0.01    | <0.01       | <0.01        | 0.40        |
| WeekendSummer      | <0.01    | <0.01       | <0.01        | 0.46        |
| IntenseSummer      | <0.01    | 0.01        | 0.04         | 0.21        |
| Within error group | <0.01    | <0.01       | <0.01        | <0.01       |

\* These datasets result in significantly worse results than random parameters.

10

11

12 Extreme outlier removal for the northern and southern side of the Alps

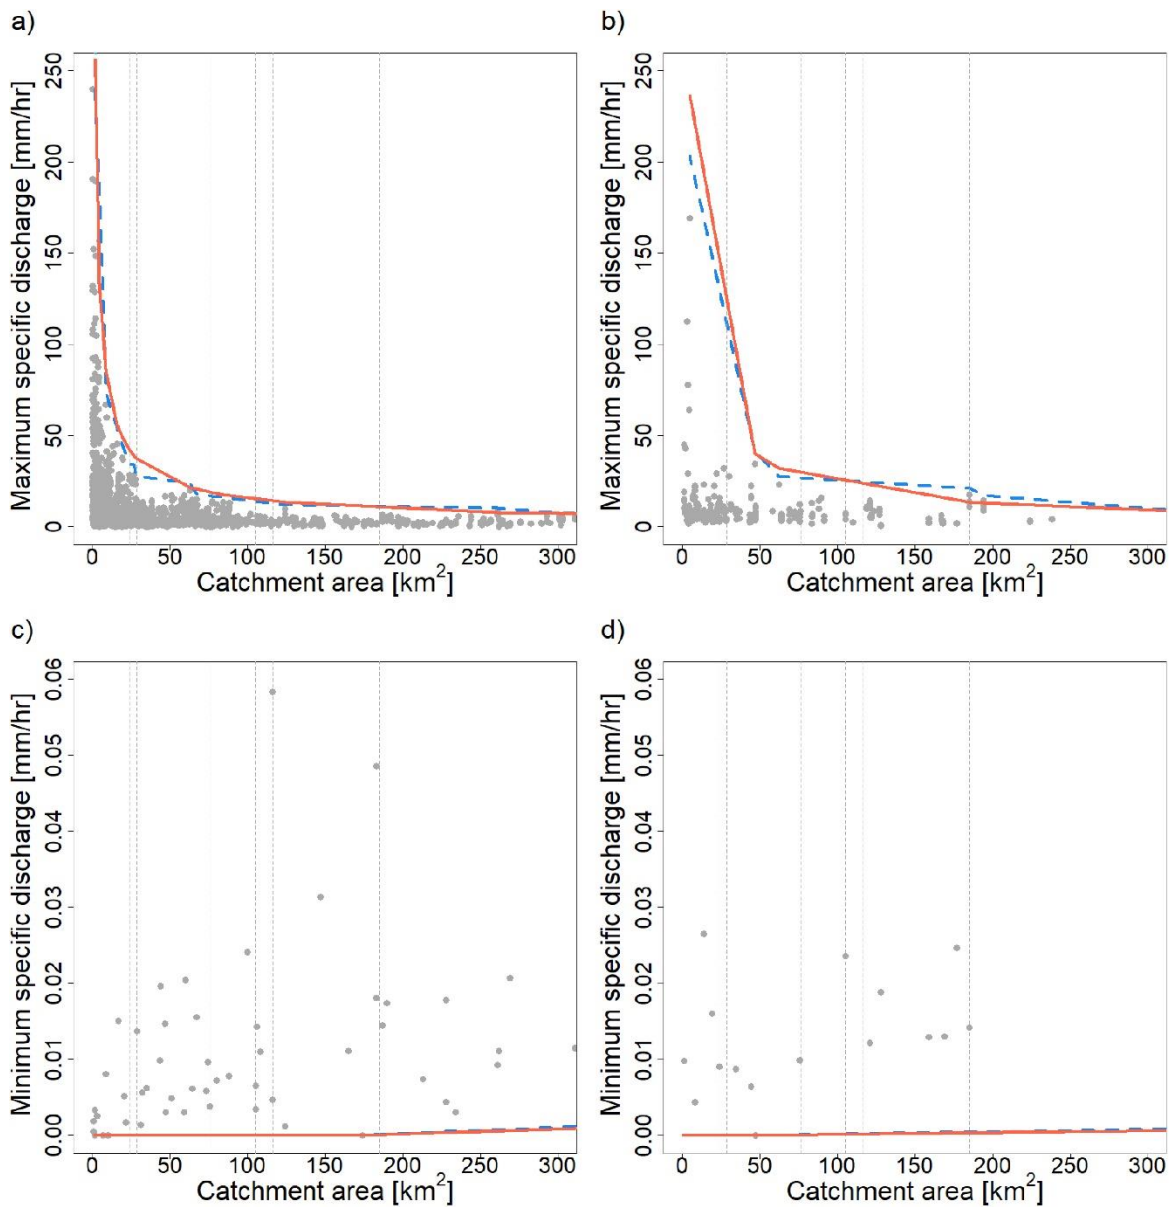

Figure S1 Relation between catchment area and maximum (a, b) and minimum (c, d) specific streamflow for catchments on the north (a, c) and south (b, d) of the Alps. The dashed light blue line is the Pareto front including the 20 % buffer. The red lines are the fitted logarithmic models used to find the maximum and minimum possible flow for each catchment.

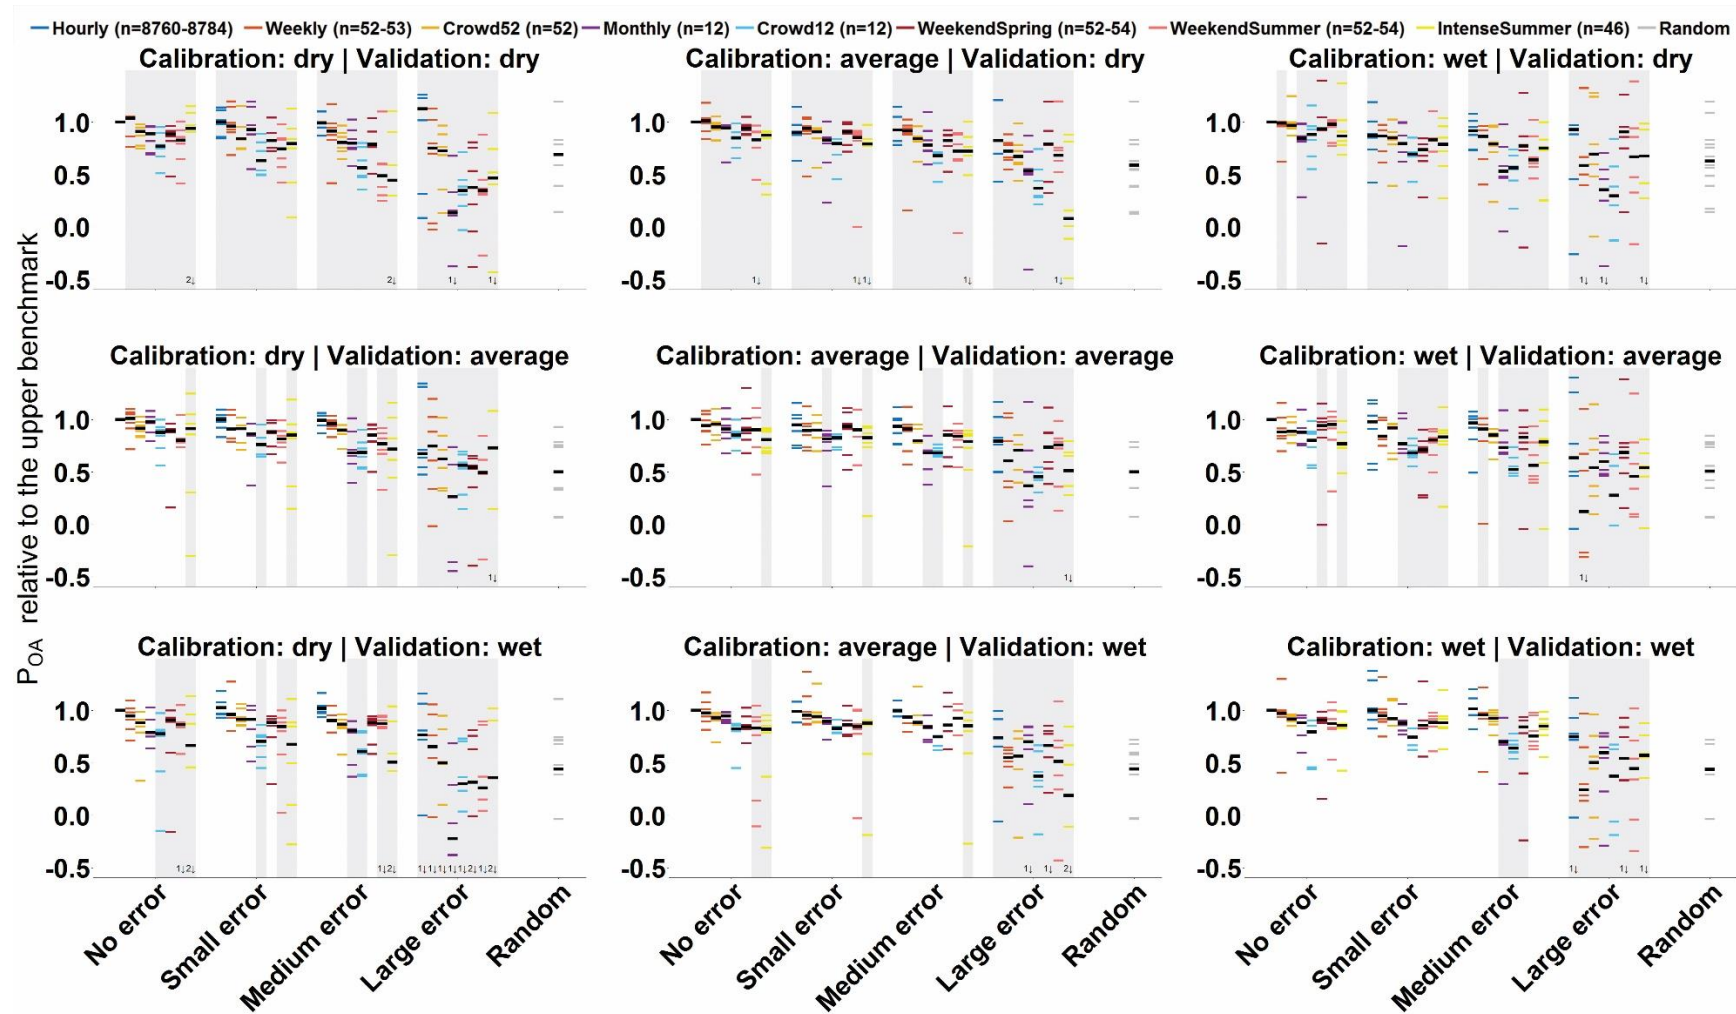

13

14 Figure S2 Median model validation performance for all datasets used for calibration during the different validation periods. Each horizontal line represents the median model  
 15 performance for one catchment. The black bold line represents the median for the six catchments. The grey rectangles around the boxes indicate non-significant differences in median  
 16 model performance for the six catchments compared to the lower benchmark with random parameters. The numbers at the bottom indicate the number of outliers beyond the figure  
 17 margins. For the individual  $P_{OA}$  values of the upper benchmark (no error – *Hourly* dataset) in the different calibration and validation years see Table 4.
